# Supplementary material for: Heat-Labile Toxin from Enterotoxigenic Escherichia coli Causes Systemic Impairment in Zebrafish Model
Source: MDPI journal article supplement (doi:10.3390/toxins13060419), 2021-06-12
Supplement: s1 [file s1]

# Supplementary Materials: Heat-Labile Toxin from Enterotoxigenic *Escherichia Coli* Causes Systemic Impairment in Zebrafish Model

Camila Henrique, Maria Alice Pimentel Falcão, Luciana De Araújo Pimenta, Adolfo Luís Almeida Maleski, Carla Lima, Thais Mitsunari, Sandra Coccuzzo Sampaio, Mônica Lopes-Ferreira and Roxane Maria Fontes Piazza

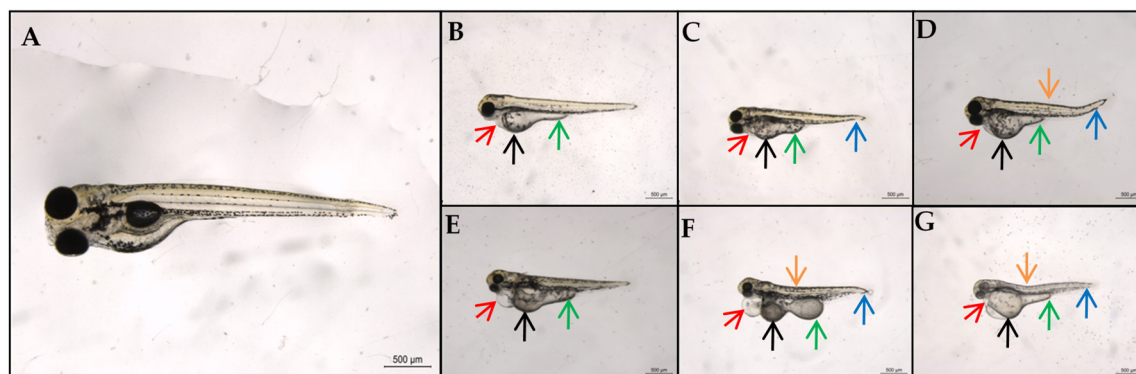

**Figure S1.** Phenotypes observed in zebrafish larvae, after FET test with different concentrations of LT-I toxin for 96 h. (A) Healthy zebrafish larva (control); (B–G) Larva evaluated after intoxication with LT-I (B) 0.31 nM. (C) 0.62 nM. (D) 1.5 nM. (E) 2.5 nM. (F and G) 5 nM. Red arrow: enlarged cardiac cavity; Black arrow: yolk edema; Green arrow: urogenital edema; Blue arrow: caudal curvature; Orange arrow: curvature of the spine.
